# Supplementary material
Source: PubMed Central journal article supplement (PMC8943623)
Supplement: jamadermatol-e220364-s001.pdf [file jamadermatol-e220364-s001.pdf]

## Supplementary Online Content

Pina Vegas L, Penso L, Claudepierre P, Sbidian E. Long-term persistence of first-line biologics for patients with psoriasis and psoriatic arthritis in the French Health Insurance Database. *JAMA Dermatol*. Published online March 23, 2022.  
doi:10.1001/jamadermatol.2022.0364

**eTable 1.** *International Statistical Classification of Diseases and Related Health Problems, Tenth Revision (ICD-10) Codes for Covariates*

**eTable 2.** New Biologic Agent Users According to Biologic Treatment for the Psoriasis (n = 16 892) and the Psoriatic Arthritis (n = 6531) Cohorts

**eTable 3.** Comparison of Treatment Classes in Sensitivity Analyses for the Psoriasis Cohort

**eTable 4.** Comparison of Treatment Classes in Sensitivity Analyses for the Psoriatic Arthritis Cohort

**eTable 5.** Results of the Conventional Multivariate Cox Proportional Hazards Model (Sensitivity Analyses)

This supplementary material has been provided by the authors to give readers additional information about their work.

**eTable 1.** *International Statistical Classification of Diseases and Related Health Problems, Tenth Revision (ICD-10) Codes for Covariates*

| Disease                                 | ICD-10 in-hospital* and medical procedures                                                                                                                                | ICD-10 LTD* | Medications (ATC Codes)*                                                                                                                                                                                                                                                                                                                                     |
|-----------------------------------------|---------------------------------------------------------------------------------------------------------------------------------------------------------------------------|-------------|--------------------------------------------------------------------------------------------------------------------------------------------------------------------------------------------------------------------------------------------------------------------------------------------------------------------------------------------------------------|
| <b>Associated inflammatory diseases</b> |                                                                                                                                                                           |             |                                                                                                                                                                                                                                                                                                                                                              |
| IBD **                                  | K50, K51, M074, M075                                                                                                                                                      | K50, K51    | .                                                                                                                                                                                                                                                                                                                                                            |
| Uveitis                                 | H20                                                                                                                                                                       | .           | .                                                                                                                                                                                                                                                                                                                                                            |
| <b>Charlson comorbidity index</b>       |                                                                                                                                                                           |             |                                                                                                                                                                                                                                                                                                                                                              |
| Diabetes                                | E100, E101, E106, E108, E109, E110, E111, E116, E118, E119, E120, E121, E126, E128-E131, E136, E138-E141, E146, E148, E149                                                |             | Reimbursement on at least 3 occasions:<br>- insulins: codes A10AB01 to A10AB06, A10AC01 to A10AC04, A10AD01 to A10AD05, A10AE01 to A10AE05, A10AE30 and A10AE56<br>- oral antidiabetic drugs: A10BA02, A10BB01 to A10BB12, A10BD02 to A10BD10, A10BF01 and A10BF02, A10BG02 A10BG03, A10BH01 to A10BH03, A10BX01 to A10BX03 and A10BX05, A10BX06 and A10BX08 |
| Diabetes with end-organ damage♦         | E102-E105, E107, E112-E115, E117, E122-E125, E127, E132-E135, E137, E142-E145, E147                                                                                       |             | .                                                                                                                                                                                                                                                                                                                                                            |
| Myocardial infarction                   | I21, I22, I252, I255                                                                                                                                                      |             | .                                                                                                                                                                                                                                                                                                                                                            |
| Congestive heart failure                | I110, I130, I132, I50                                                                                                                                                     |             | .                                                                                                                                                                                                                                                                                                                                                            |
| Peripheral vascular disease             | I70, I71, I731, I738, I739, I771, I790, I792, K551, K558, K559, Z958, Z959<br>EDAF003, EDAF006, EDLF004, EDLF007, EDPF006, EEAFF002, EEAFF004, EEAFF006, EELF002, EEPF001 |             | .                                                                                                                                                                                                                                                                                                                                                            |
| Hemiplegia                              | G041, G114, G801, G802, G81, G82, G830, G831-G834, G839                                                                                                                   |             | .                                                                                                                                                                                                                                                                                                                                                            |
| Cerebrovascular disease                 | G45, G46, H340, I60-I69                                                                                                                                                   |             | .                                                                                                                                                                                                                                                                                                                                                            |
| Dementia                                | F00-F03, F051, G30, G311                                                                                                                                                  |             | Reimbursement on at least 3 occasions:<br>N06DA, N06DX01                                                                                                                                                                                                                                                                                                     |
| Connective tissue disease               | M05, M06, M315, M32, M33, M34, M351, M353, M360                                                                                                                           |             | .                                                                                                                                                                                                                                                                                                                                                            |
| Chronic pulmonary disease               | I278, I279, J40-J47, J60, J67, J684, J701, J703                                                                                                                           |             | Reimbursement on at least 2 occasions:<br>- inhaled beta-2-agonists: R03AB03, R03AC02 to R03AC04, R03AC08, R03AC12 and R03AC13 codes, R03AC18 and R03AC19, R03AK06 to                                                                                                                                                                                        |

| Disease                                                                                                                                                                                                          | ICD-10 in-hospital* and medical procedures                                                                                                                                                                            | ICD-10 LTD* | Medications (ATC Codes)*                                                                                                                                                                                                                                                                                                                               |
|------------------------------------------------------------------------------------------------------------------------------------------------------------------------------------------------------------------|-----------------------------------------------------------------------------------------------------------------------------------------------------------------------------------------------------------------------|-------------|--------------------------------------------------------------------------------------------------------------------------------------------------------------------------------------------------------------------------------------------------------------------------------------------------------------------------------------------------------|
|                                                                                                                                                                                                                  |                                                                                                                                                                                                                       |             | R03AK08, R03AK10 and R03AK11, R03AL01 to R03AL04<br>- inhaled corticosteroids: R03BA01 to R03BA03 and R03BA05, R03BA07, R03BA08<br>- inhaled anticholinergics: R03BB01, R03BB02, R03BB04, R03BB06, R03BB07<br>- others inhaled drugs: R03BC01, R03BC03<br>- systemic therapies: R03CC02, R03CC03, R03CC12, R03DA04, R03DA05, R03DA08, R03DC03, R03DX05 |
| Ulcer disease                                                                                                                                                                                                    | K25-K28                                                                                                                                                                                                               |             | .                                                                                                                                                                                                                                                                                                                                                      |
| Mild liver disease                                                                                                                                                                                               | B18, K700-K703, K709, K713, K715, K717, K73, K74, K760, K762-K764, K768, K769, Z944                                                                                                                                   |             | .                                                                                                                                                                                                                                                                                                                                                      |
| Moderate or severe liver disease                                                                                                                                                                                 | I850, I859, I864, I982, K704, K711, K721, K729, K765-K767                                                                                                                                                             |             | .                                                                                                                                                                                                                                                                                                                                                      |
| Moderate or severe renal disease                                                                                                                                                                                 | I120, I131, N032-N037, N052-N057, N18, N19, N250, Z490, Z491, Z492, Z940, Z992<br>JAEA003, HNEA002, JVJB001, JVJF004, JVJF008, JVRP004, JVRP007, JVRP008, YYYYY007, 2121-2129, 2131, 2132, 2134-2140, 2142-2146,2334, |             | .                                                                                                                                                                                                                                                                                                                                                      |
| Any tumor (including lymphoma and leukemia except for malignant neoplasm of skin)                                                                                                                                | C00-C26, C30-C34, C37-C41, C43, C45-C58, C60-C76, C81-C85, C88, C90-C97                                                                                                                                               |             | .                                                                                                                                                                                                                                                                                                                                                      |
| Metastatic solid tumor                                                                                                                                                                                           | C77-C80                                                                                                                                                                                                               |             | .                                                                                                                                                                                                                                                                                                                                                      |
| HIV-AIDS                                                                                                                                                                                                         | B20-B22, B24, Z21                                                                                                                                                                                                     |             |                                                                                                                                                                                                                                                                                                                                                        |
| <b>Other comorbidities</b>                                                                                                                                                                                       |                                                                                                                                                                                                                       |             |                                                                                                                                                                                                                                                                                                                                                        |
| Dyslipidemia without associated pathology: <i>no code for coronary heart disease or stroke or heart failure or atherosclerosis of arteries of extremities or chronic end-stage kidney failure or diabetes **</i> | .                                                                                                                                                                                                                     |             | Reimbursement on at least 3 occasions:<br>- statins: C10AA, C10BA, C10BX<br>- fibrates: C10AB<br>- other lipid-lowering agents: C10AC, C10AD, C10AX                                                                                                                                                                                                    |
| Other hospital discharge diagnosis related to tobacco                                                                                                                                                            | F17, Z71.6, Z72.0                                                                                                                                                                                                     | .           | Reimbursement on at least 3 occasions:<br>- nicotine: N07BA01                                                                                                                                                                                                                                                                                          |

| Disease                       | ICD-10 in-hospital* and medical procedures                                                                                                                                                                                                        | ICD-10 LTD* | Medications (ATC Codes)*                      |
|-------------------------------|---------------------------------------------------------------------------------------------------------------------------------------------------------------------------------------------------------------------------------------------------|-------------|-----------------------------------------------|
|                               |                                                                                                                                                                                                                                                   |             | - varenicline: N07BA03<br>- cytisine: N07BA04 |
| Morbid or complicated obesity | E66<br>Medical acts in the year n to n-5:<br>HFCA001, HFCC003, HFFA001,<br>HFFA011, HFFC004, HFFC018,<br>HFMA009, HFMA010, HFMC006,<br>HFMC007, HGCA009, HGCC027,<br>HFLE002, HFLC900, HFGC900,<br>HFKC001, HFKA002, HFMC008,<br>HFMA011, HFKA001 | .           | .                                             |

\* Recorded during the 12 months before inclusion.

\*\* Use of disease definition algorithms developed by the French National Health Insurance Fund for Employees.

♦ The definition of diabetes with end-organ damage was completed by identification of diabetes plus at least one of the following conditions: myocardial infarction, moderate or severe renal disease, or cerebrovascular disease.

*ICD-10: International Classification of Diseases, 10th edition; LTD: long-term disease; ATC: Anatomical Therapeutic Chemical; IBD: inflammatory bowel disease; HIV-AIDS: Human immunodeficiency virus-acquired immunodeficiency syndrome*

**eTable 2.** New Biologic Agent Users According to Biologic Treatment for the Psoriasis (n = 16 892) and the Psoriatic Arthritis (n = 6531) Cohorts

|                          | <b>Psoriasis cohort</b> | <b>Psoriatic arthritis cohort</b> |
|--------------------------|-------------------------|-----------------------------------|
| <b>TNF inhibitors</b>    | <b>n = 10,199</b>       | <b>n = 4,974</b>                  |
| Adalimumab               | 5,944 (35.2)            | 2,380 (36.4)                      |
| Certolizumab             | 408 (2.4)               | 359 (5.5)                         |
| Etanercept               | 2,057 (12.2)            | 1,610 (24.6)                      |
| Golimumab                | -                       | 583 (8.9)                         |
| Infliximab               | 1,790 (10.6)            | 42 (0.6)                          |
| <b>IL12/23 inhibitor</b> | <b>n = 3,982</b>        | <b>n = 803</b>                    |
| Ustekinumab              | 3,982 (23.6)            | 803 (10.8)                        |
| <b>IL17 inhibitors</b>   | <b>n = 2,711</b>        | <b>n = 754</b>                    |
| Secukinumab              | 2,133 (12.6)            | 696 (10.6)                        |
| Ixekizumab               | 502 (3.0)               | 58 (0.9)                          |
| Brodalumab               | 76 (0.4)                | -                                 |

Data are n (%).

*TNF: tumor necrosis factor; IL: interleukin.*

**eTable 3.** Comparison of Treatment Classes in Sensitivity Analyses for the Psoriasis Cohort

|                                                         | IL17i vs TNFi            |                            | IL12/23i vs TNFi         |                            | IL17i vs IL12/23i        |         |
|---------------------------------------------------------|--------------------------|----------------------------|--------------------------|----------------------------|--------------------------|---------|
|                                                         | HR <sub>w</sub> (95% CI) | p-value                    | HR <sub>w</sub> (95% CI) | p-value                    | HR <sub>w</sub> (95% CI) | p-value |
| Intention-to-treat analysis                             | <b>0.86 (0.78-0.96)</b>  | <b>&lt;10<sup>-3</sup></b> | 0.92 (0.84-1.00)         | 0.05                       | 0.93 (0.83-1.06)         | 0.29    |
| Discontinuation: gap 30                                 | <b>0.77 (0.72-0.82)</b>  | <b>&lt;10<sup>-4</sup></b> | <b>0.77 (0.73-0.81)</b>  | <b>&lt;10<sup>-4</sup></b> | 1.00 (0.93-1.08)         | 0.99    |
| Discontinuation: gap 90                                 | <b>0.79 (0.74-0.84)</b>  | <b>&lt;10<sup>-4</sup></b> | <b>0.76 (0.72-0.80)</b>  | <b>&lt;10<sup>-4</sup></b> | 1.03 (0.96-1.11)         | 0.37    |
| New users: 5-years                                      | <b>0.74 (0.69-0.79)</b>  | <b>&lt;10<sup>-4</sup></b> | <b>0.73 (0.69-0.77)</b>  | <b>&lt;10<sup>-4</sup></b> | 1.01 (0.93-1.10)         | 0.73    |
| After the market entry of all studied therapeutic class | <b>0.81 (0.73-0.89)</b>  | <b>&lt;10<sup>-4</sup></b> | <b>0.81 (0.74-0.88)</b>  | <b>&lt;10<sup>-4</sup></b> | 1.00 (0.89-1.12)         | 0.97    |

Values in bold correspond to significant results. *HR<sub>w</sub>*: weighted hazard ratio; *95%CI*: 95% confidence interval; *ILi*: interleukin inhibitor; *TNFi*: tumor necrosis factor inhibitor.

**eTable 4.** Comparison of Treatment Classes in Sensitivity Analyses for the Psoriatic Arthritis Cohort

|                                                         | IL17i vs TNFi           |                            | IL12/23i vs TNFi        |         | IL17i vs IL12/23i       |                            |
|---------------------------------------------------------|-------------------------|----------------------------|-------------------------|---------|-------------------------|----------------------------|
|                                                         | HR <sub>w</sub> (95%CI) | p-value                    | HR <sub>w</sub> (95%CI) | p-value | HR <sub>w</sub> (95%CI) | p-value                    |
| Intention-to-treat analysis                             | <b>0.72 (0.58-0.89)</b> | <b>&lt;10<sup>-3</sup></b> | 1.02 (0.86-1.20)        | 0.84    | <b>0.70 (0.54-0.91)</b> | <b>&lt;10<sup>-3</sup></b> |
| Discontinuation: gap 30                                 | <b>0.70 (0.58-0.84)</b> | <b>&lt;10<sup>-4</sup></b> | 1.04 (0.90-1.19)        | 0.59    | <b>0.67 (0.54-0.84)</b> | <b>&lt;10<sup>-4</sup></b> |
| Discontinuation: gap 90                                 | <b>0.71 (0.58-0.86)</b> | <b>&lt;10<sup>-4</sup></b> | 1.03 (0.89-1.19)        | 0.70    | <b>0.68 (0.55-0.86)</b> | <b>&lt;10<sup>-3</sup></b> |
| New-users: 5-years                                      | <b>0.73 (0.58-0.92)</b> | <b>&lt;10<sup>-3</sup></b> | 1.19 (0.98-1.44)        | 0.07    | <b>0.61 (0.57-0.82)</b> | <b>&lt;10<sup>-4</sup></b> |
| After the market entry of all studied therapeutic class | <b>0.57 (0.43-0.76)</b> | <b>&lt;10<sup>-4</sup></b> | 1.00 (0.66-1.41)        | 0.90    | 0.73 (0.51-1.06)        | 0.09                       |

Values in bold correspond to significant results. *HR<sub>w</sub>*: weighted hazard ratio; *95%CI*: 95% confidence interval; *ILi*: interleukin inhibitor; *TNFi*: tumor necrosis factor inhibitor.

**eTable 5.** Results of the Conventional Multivariate Cox Proportional Hazards Model (Sensitivity Analyses)

|                                                       | Psoriasis cohort*       |                   | Psoriatic arthritis cohort* |                   |
|-------------------------------------------------------|-------------------------|-------------------|-----------------------------|-------------------|
|                                                       | HR <sub>a</sub> (95%CI) | p-value           | HR <sub>a</sub> (95%CI)     | p-value           |
| IL17i vs TNFi                                         | <b>0.77 (0.72-0.82)</b> | <10 <sup>-4</sup> | <b>0.73 (0.61-0.89)</b>     | <10 <sup>-3</sup> |
| IL12/23i vs TNFi                                      | <b>0.75 (0.71-0.79)</b> | <10 <sup>-4</sup> | 0.95 (0.81-1.11)            | 0.53              |
| IL17i vs IL12/23i                                     | 1.03 (0.95-1.11)        | 0.46              | <b>0.77 (0.61-0.97)</b>     | <b>0.03</b>       |
| Age                                                   | <b>0.99 (0.99-0.99)</b> | <10 <sup>-4</sup> | <b>0.99 (0.99-0.99)</b>     | <b>0.04</b>       |
| Sex (ref : male)                                      | <b>1.33 (1.28-1.40)</b> | <10 <sup>-4</sup> | <b>1.38 (1.29-1.47)</b>     | <10 <sup>-4</sup> |
| Complementary universal health coverage               | <b>1.19 (1.11-1.28)</b> | <10 <sup>-4</sup> | 0.98 (0.84-1.15)            | 0.05              |
| Charlson score (ref: 1)                               |                         |                   |                             |                   |
| 2                                                     | <b>1.18 (1.12-1.25)</b> | <10 <sup>-4</sup> | <b>1.22 (1.21-1.34)</b>     | <10 <sup>-4</sup> |
| 3                                                     | <b>1.29 (1.06-1.56)</b> | <10 <sup>-3</sup> | <b>1.32 (1.12-1.65)</b>     | <10 <sup>-4</sup> |
| 4                                                     | 1.03 (0.61-1.72)        | 0.91              | 1.06 (0.81-1.92)            | 0.12              |
| Smoking                                               | 0.98 (0.72-1.32)        | 0.88              | 1.08 (0.97-1.20)            | 0.29              |
| Obesity                                               | <b>1.28 (1.08-1.51)</b> | <10 <sup>-3</sup> | 1.20 (0.97-1.20)            | 0.17              |
| Associated non-biologic drugs within 2 years (ref: 0) |                         |                   |                             |                   |
| 1                                                     | 1.01 (0.95-1.07)        | 0.69              | 1.12 (0.84-1.17)            | 0.72              |
| 2                                                     | <b>1.07 (1.00-1.15)</b> | <b>0.03</b>       | <b>1.21 (1.10-1.65)</b>     | <b>0.02</b>       |
| 3                                                     | <b>1.23 (1.11-1.35)</b> | <10 <sup>-4</sup> | <b>1.34 (1.25-1.45)</b>     | <10 <sup>-4</sup> |
| Number of specialist visits within 2 years (ref: 0)   |                         |                   |                             |                   |
| 1                                                     | 1.08 (0.98-1.18)        | 0.11              | 1.08 (0.98-1.18)            | 0.11              |
| 2                                                     | 0.98 (0.93-1.03)        | 0.50              | <b>0.87 (0.76-0.97)</b>     | <b>0.04</b>       |
| Hospitalization within 2 years                        | <b>1.09 (1.02-1.16)</b> | <10 <sup>-3</sup> | 1.07 (0.98-1.16)            | 0.12              |

Values in bold correspond to significant results. \*The co-reimbursement of non-biologic drugs or prednisone with biologics was considered a time-varying variable. HR<sub>a</sub>: adjusted hazard ratio; 95%CI: 95% confidence interval; ILi: interleukin inhibitor; TNFi: tumor necrosis factor inhibitor.
